# Supplementary material
Source: HighWire-hosted journal article supplement (https://mbio.asm.org/content/11/4/e01728-20)

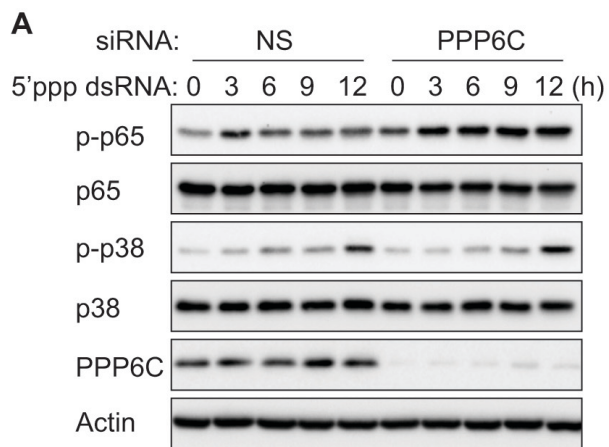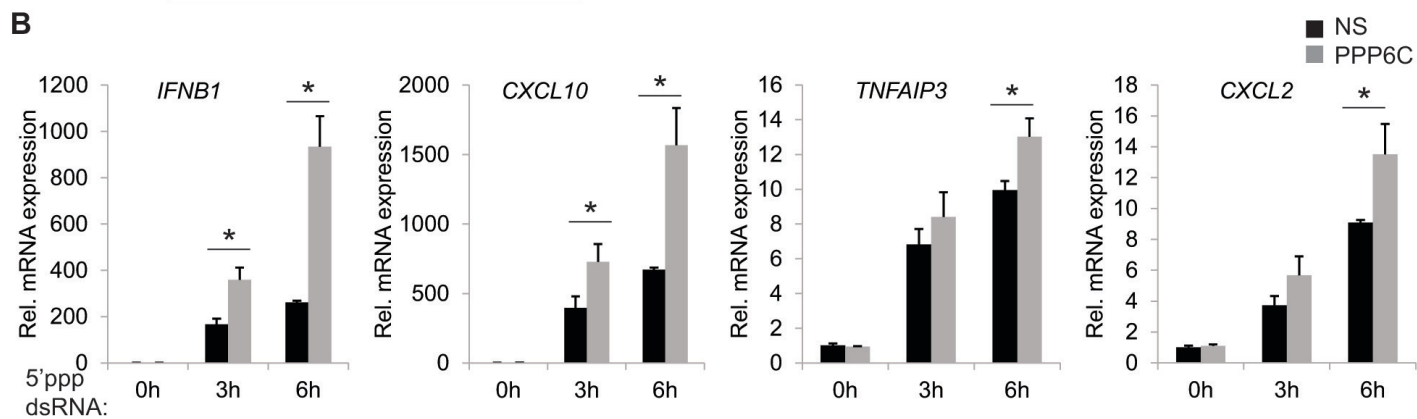

Supplement: inline-supplementary-material-3 [file inline-supplementary-material-3.pdf]
